# Supplementary material
Source: PubMed Central journal article supplement (PMC2726421)
Supplement: 0906529106_0906529106SI.pdf [file 0906529106_0906529106SI.pdf]

# Supporting Information

Soler Bistué et al. 10.1073/pnas.0906529106

## SI Text

**RNA-Binding Assays.** The 5'-end-labeled EGSs (10 pmol/1  $\mu$ M) were incubated 2 h at 25 °C in 10  $\mu$ L STE buffer with 0, 5, 10, 50, or 100 pmol/0, 0.5, 1, 5, or 10  $\mu$ M *aac(6')-Ib* mRNA and

analyzed on a 5% native GTG-PAGE as described in Sarno R, et al. (2003) Inhibition of aminoglycoside 6'-*N*-acetyltransferase type Ib-mediated amikacin resistance by antisense oligodeoxynucleotides. *Antimicrob Agents Chemother* 47:3296–3304.

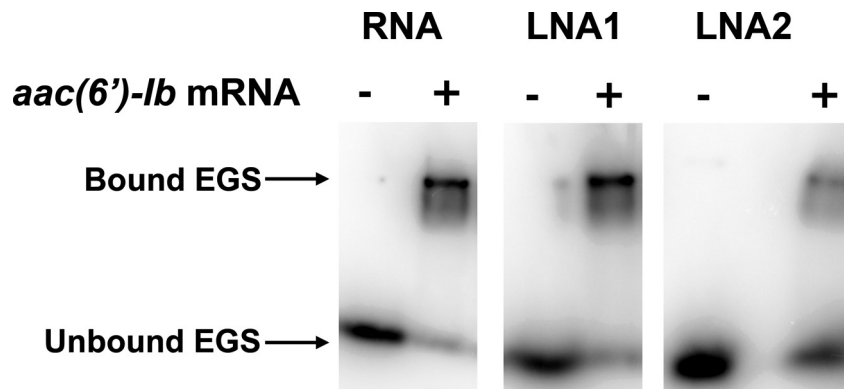

**Fig. S1.** Binding of unsubstituted EGSC3 (RNA), LNA1, and LNA2 to *aac(6)-Ib* mRNA. The 5'-end-labeled EGSs and *aac(6)-Ib* mRNA were incubated as described in [S1 Text](#) and analyzed in native polyacrylamide gel electrophoresis.

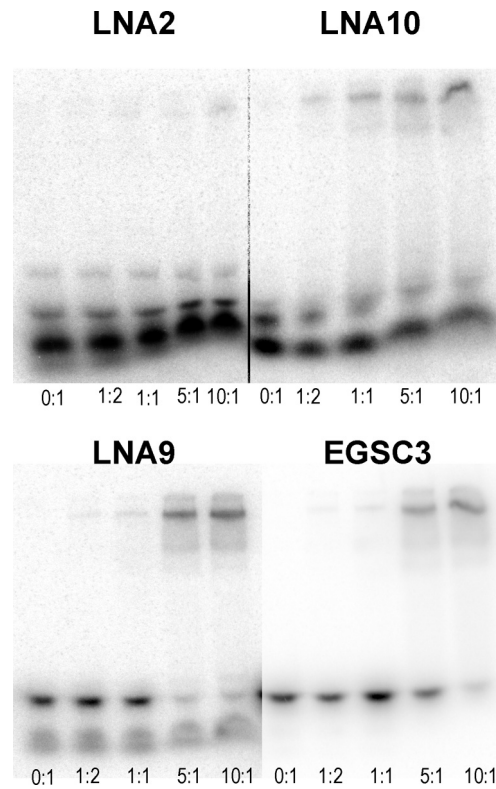

**Fig. S2.** Binding of EGSC3, LNA2, LNA9, and LNA10 to *aac(6)-Ib* mRNA. The 5'-end-labeled EGSs and *aac(6)-Ib* mRNA were incubated at the EGS:mRNA ratios indicated in the figure as described in [SI Text](#) and then analyzed in native polyacrylamide gel electrophoresis.

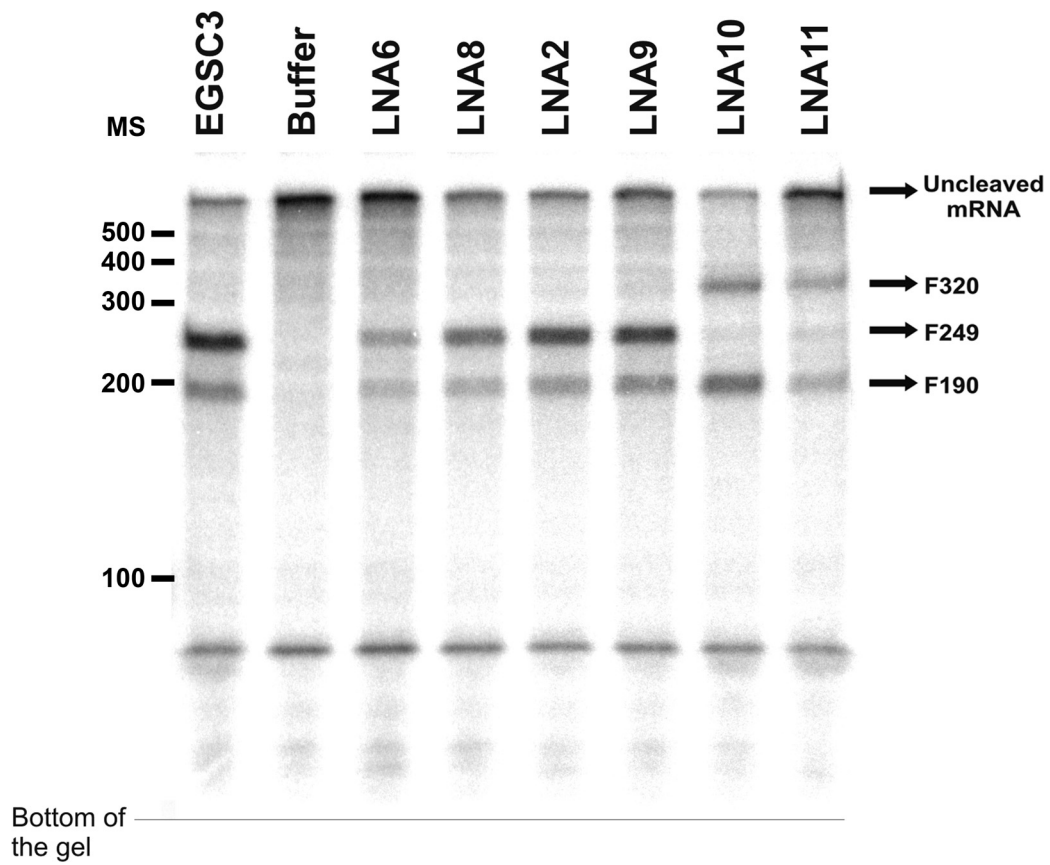

**Fig. S3.** Activities of LNA/DNA co-oligomer EGs. The gel is identical to that shown in Fig. 2B but the electrophoresis was carried out for only 20 min to allow all molecular weight products to stay inside the gel. The band at ca. 90 nucleotides is present in all radioactively labeled mRNA samples.

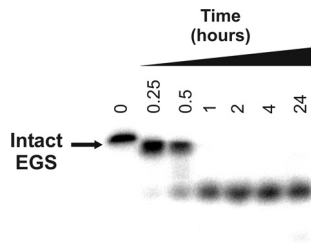

**Fig. S4.** Time course of EGSC3 decay upon exposure to bacterial lysates.  $^{32}\text{P}$ -labeled EGSC3 was incubated in the presence of cell extracts obtained by soft sonication for the indicated times and analyzed by 15% PAGE.

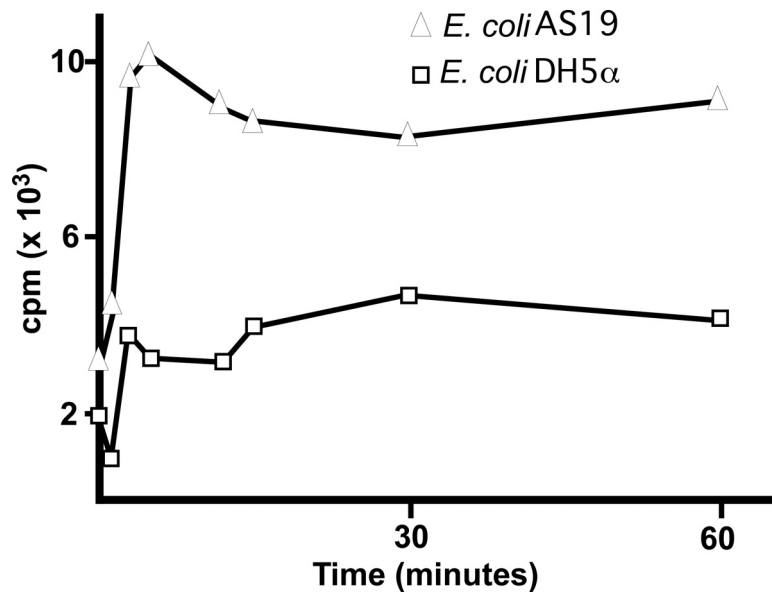

**Fig. S5.** Accumulation of [<sup>32</sup>P] LNA9 in *E. coli* DH5α (open squares) or *E. coli* AS19 (open triangles). Exponentially grown cells (OD<sub>600</sub> 0.6) were washed twice with ice-cold modified Tanaka buffer. Cells were incubated in the presence of 50 μM of [<sup>32</sup>P] LNA9. Aliquots were taken at different time points and filtered through Millipore 0.45-μM filters. Filters were washed twice with 1 mL cold PBS buffer and radioactivity was measured with a liquid scintillation counter.

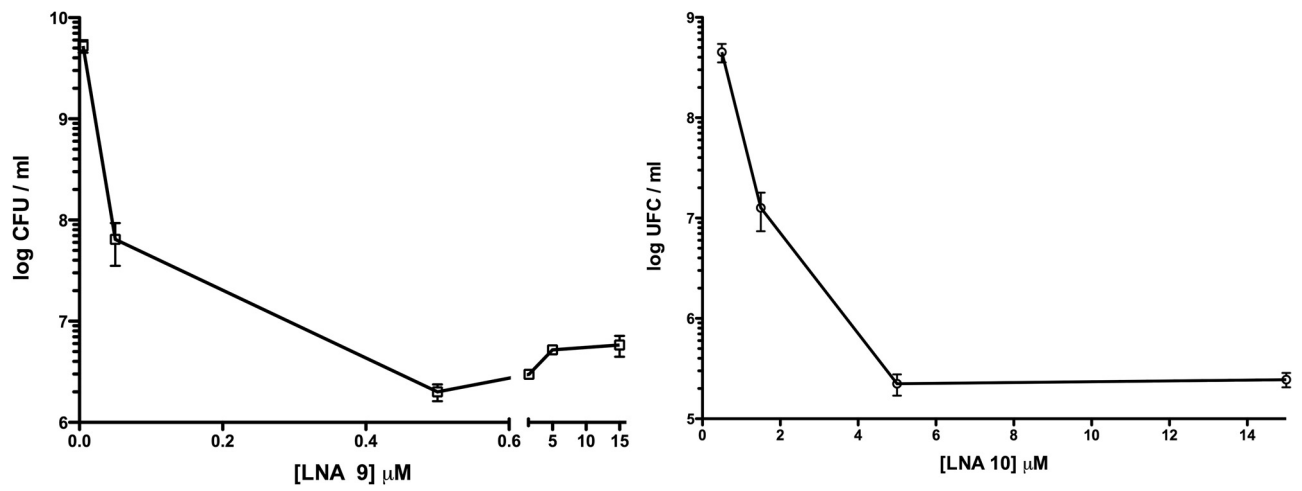

Fig. S6. Colony forming units of *E. coli* AS19(pFC9) exposed to Ak after pretreatment with different concentrations of LNA9 or LNA10. Results are expressed as log of mean  $\pm$  SD of colony forming units per milliliter (log CFU/mL).
